# Supplementary material
Source: ML conference proceedings conference paper supplement (https://openreview.net/forum?id=hTxYJAKY85)
Supplement: supplementary_material [file attachment]

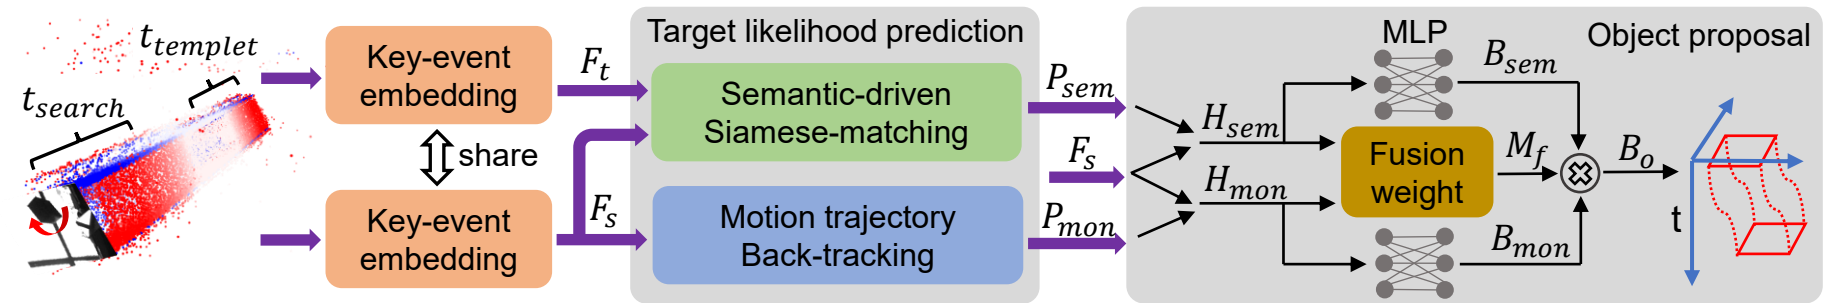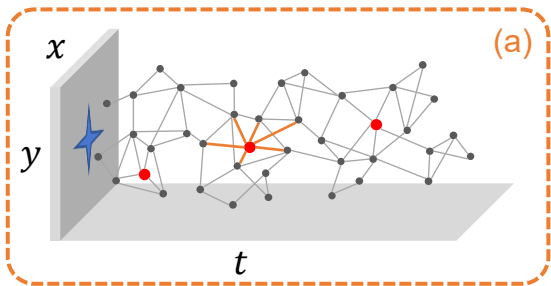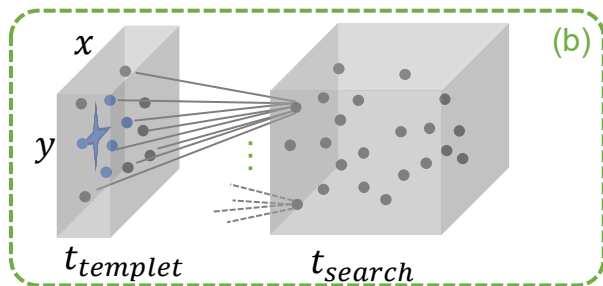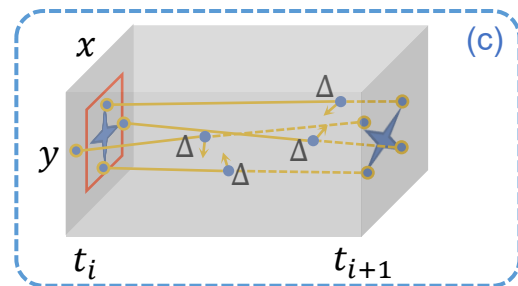

Workflow

Object motion

Multiplication

Target key event

Initial position

Key event

Graph aggregation

Trajectory

Bounding box

Motion flow
